# Supplementary material for: Detection and Molecular Characterization of Two FAD3 Genes Controlling Linolenic Acid Content and Development of Allele-Specific Markers in Yellow Mustard (Sinapis alba)
Source: PubMed Central journal article supplement (PMC4019595; doi:10.1371/journal.pone.0097430), 2014-05-13
Supplement: pone.0097430.s001.pdf [file pone.0097430.s001.pdf]

LA<sup>1</sup>: ATGTTTCTGCTATGGACCAGCCTAGCAATGTGAACGGAGATTC-----TCGGAAGAAGGTTTGATCCGAGCCGACAA : 75  
la<sup>1</sup>: ATGTTTCTGCTATGGACCAGCCTAGCAATGTGAACGGAGATTC-----TCGGAAGAAGGTTTGATCCGAGCCGACAA : 75  
LA<sup>2</sup>: ATGTTTCTGCTATGGACCAGCCTAGCAATGTGAACGGAGATTC-----TCGGAAGAAGGTTTGATCCGAGCCGACAA : 84  
la<sup>2</sup>: ATGTTTCTGCTATGGACCAGCCTAGCAATGTGAACGGAGATTC-----TCGGAAGAAGGTTTGATCCGAGCCGACAA : 84

LA<sup>1</sup>: CCACCGTTTAAAGATCGGAGATATAAGCGCGCGATTCTAAGCATTGTTGGTTAAAAAGTCCTTTGAGATCCTATGAGCTACGTC : 159  
la<sup>1</sup>: CCACCGTTTAAAGATCGGAGATATAAGCGCGCGATTCTAAGCATTGTTGGTTAAAAAGTCCTTTGAGATCCTATGAGCTACGTC : 159  
LA<sup>2</sup>: CCACCGTTTAAAGATCGGAGATATAAGCGCGCGATTCTAAGCATTGTTGGTTAAAAAGTCCTTTGAGATCCTATGAGCTACGTC : 168  
la<sup>2</sup>: CCACCGTTTAAAGATCGGAGATATAAGCGCGCGATTCTAAGCATTGTTGGTTAAAAAGTCCTTTGAGATCCTATGAGCTACGTC : 168

LA<sup>1</sup>: GCGAGAGACATTTTCGCCGTCGGCTCTGCCGTCGCCCGCGTATTTTAAATAGCTGGCTCTCTGGCCCTCTTATTTGGGCG : 243  
la<sup>1</sup>: GCGAGAGACATTTTCGCCGTCGGCTCTGCCGTCGCCCGCGTATTTTAAATAGCTGGCTCTCTGGCCCTCTTATTTGGGCG : 243  
LA<sup>2</sup>: GCGAGAGACATTTTCGCCGTCGGCTCTGCCGTCGCCCGCGTATTTTAAATAGCTGGCTCTCTGGCCCTCTTATTTGGGCG : 252  
la<sup>2</sup>: GCGAGAGACATTTTCGCCGTCGGCTCTGCCGTCGCCCGCGTATTTTAAATAGCTGGCTCTCTGGCCCTCTTATTTGGGCG : 252

LA<sup>1</sup>: GCCCAAGGAACCTTTTCTGGGCTATCTTCGTACTCGGCCAGCACTGTGGACATGGGAGCTTCTCAGACATTCCTCTCTGAAT : 327  
la<sup>1</sup>: GCCCAAGGAACCTTTTCTGGGCTATCTTCGTACTCGGCCAGCACTGTGGACATGGGAGCTTCTCAGACATTCCTCTCTGAAT : 327  
LA<sup>2</sup>: GCCCAAGGAACCTTTTCTGGGCTATCTTCGTACTCGGCCAGCACTGTGGACATGGGAGCTTCTCAGACATTCCTCTCTGAAT : 336  
la<sup>2</sup>: GCCCAAGGAACCTTTTCTGGGCTATCTTCGTACTCGGCCAGCACTGTGGACATGGGAGCTTCTCAGACATTCCTCTCTGAAT : 336

LA<sup>1</sup>: ACGTGGTTGGTCATATCTTCATTCCTTATCCTCGTCCATACCATGGTTGGAGAATAAGCCATCGGACACACCACCAGAAC : 411  
la<sup>1</sup>: ACGTGGTTGGTCATATCTTCATTCCTTATCCTCGTCCATACCATGGTTGGAGAATAAGCCATCGGACACACCACCAGAAC : 411  
LA<sup>2</sup>: ACGTGGTTGGTCATATCTTCATTCCTTATCCTCGTCCATACCATGGTTGGAGAATAAGCCATCGGACACACCACCAGAAC : 420  
la<sup>2</sup>: ACGTGGTTGGTCATATCTTCATTCCTTATCCTCGTCCATACCATGGTTGGAGAATAAGCCATCGGACACACCACCAGAAC : 420

LA<sup>1</sup>: -----CATGGCCATGTTGAAAACGA : 431  
la<sup>1</sup>: TAGGCCCTGGGCGTTCGGGGCCCCCGTCGGATTCCGTTCCGTTAAATTTGGATTTTCGGATTTTCG : 475  
LA<sup>2</sup>: -----CATGGCCATGTTGAAAACGA : 440  
la<sup>2</sup>: -----CATGGCCATGTTGAAAACGA : 440

LA<sup>1</sup>: CGAGCTTGGGTTCCGTTCCAGAAAAATATACAAGAAATTCCTCCACAGTACACGGATGCTCAGATACACCTGTCCCTCTGCC : 515  
la<sup>1</sup>: -----TTGCCAGAAAAATATACAAGAAATTCCTCCACAGTACACGGATGCTCAGATACACCTGTCCCTCTGCC : 543  
LA<sup>2</sup>: CGAGCTTGGGTTCCGTTCCAGAAAAATATACAAGAAATTCCTCCACAGTACACGGATGCTCAGATACACCTGTCCCTCTGCC : 524  
la<sup>2</sup>: CGAGCTTGGGTTCCGTTCCAGAAAAATATACAAGAAATTCCTCCACAGTACACGGATGCTCAGATACACCTGTCCCTCTGCC : 524

LA<sup>1</sup>: CATGCTCGCTTACCCCTCTATCTGTGGTACAGAAGTCCCTGGTAAAGAAGGGTCCACATATAACCCATACAGTAGTTATTTGC : 599  
la<sup>1</sup>: CATGCTCGCTTACCCCTCTATCTGTGGTACAGAAGTCCCTGGTAAAGAAGGGTCCACATATAACCCATACAGTAGTTATTTGC : 627  
LA<sup>2</sup>: CATGCTCGCTTACCCCTCTATCTGTGGTACAGAAGTCCCTGGTAAAGAAGGGTCCACATATAACCCATACAGTAGTTATTTGC : 608  
la<sup>2</sup>: CATGCTCGCTTACCCCTCTATCTGTGGTACAGAAGTCCCTGGTAAAGAAGGGTCCACATATAACCCATACAGTAGTTATTTGC : 608

LA<sup>1</sup>: TCCAAGCGAGAGAAACTTATTGCAACTTCAACTACTTGTGGTCCATCATGTTGGCCACTCTTGTTTATCTATCTTCTCTGCT : 683  
la<sup>1</sup>: TCCAAGCGAGAGAAACTTATTGCAACTTCAACTACTTGTGGTCCATCATGTTGGCCACTCTTGTTTATCTATCTTCTCTGCT : 711  
LA<sup>2</sup>: TCCAAGCGAGAGAAACTTATTGCAACTTCAACTACTTGTGGTCCATCATGTTGGCCACTCTTGTTTATCTATCTTCTCTGCT : 692  
la<sup>2</sup>: TCCAAGCGAGAGAAACTTATTGCAACTTCAACTACTTGTGGTCCATCATGTTGGCCACTCTTGTTTATCTATCTTCTCTGCT : 692

LA<sup>1</sup>: TGGTCCATTCACAGTTCTCAAAGTTATGGTGTTCCTACATATCTTTGTGATGTGGTGGACGCTGTCACGTACTTGCATCA : 767  
la<sup>1</sup>: TGGTCCATTCACAGTTCTCAAAGTTATGGTGTTCCTACATATCTTTGTGATGTGGTGGACGCTGTCACGTACTTGCATCA : 795  
LA<sup>2</sup>: TGGTCCATTCACAGTTCTCAAAGTTATGGTGTTCCTACATATCTTTGTGATGTGGTGGACGCTGTCACGTACTTGCATCA : 776  
la<sup>2</sup>: TGGTCCATTCACAGTTCTCAAAGTTATGGTGTTCCTACATATCTTTGTGATGTGGTGGACGCTGTCACGTACTTGCATCA : 776

LA<sup>1</sup>: TCCATGTTCCAGTATTAAGTTGCCTTGGTACAGAGGCAAGGAATGGAGTTATTTACGTGGAGGATTAACAACCTGTTGATAGAGA : 851  
la<sup>1</sup>: TCCATGTTCCAGTATTAAGTTGCCTTGGTACAGAGGCAAGGAATGGAGTTATTTACGTGGAGGATTAACAACCTGTTGATAGAGA : 879  
LA<sup>2</sup>: TCCATGTTCCAGTATTAAGTTGCCTTGGTACAGAGGCAAGGAATGGAGTTATTTACGTGGAGGATTAACAACCTGTTGATAGAGA : 860  
la<sup>2</sup>: TCCATGTTCCAGTATTAAGTTGCCTTGGTACAGAGGCAAGGAATGGAGTTATTTACGTGGAGGATTAACAACCTGTTGATAGAGA : 860

```

*          940          *          960          *          980          *          1000
LA1 : TTACGGGATCTTCAACAACATTGATCAGGATATTGGAACACAGTGATCCATCATCTTTCCACAAAATCCCCACTATCACTT : 935
la1 : TTACGGGATCTTCAACAACATTGATCAGGATATTGGAACACAGTGATCCATCATCTTTCCACAAAATCCCCACTATCACTT : 963
LA2 : TTATGGGATCTTCAACAACATCCATCAGGATATTGGAACACAGTGATCCATCATCTTTCCACAAAATCCCCACTATCACTT : 944
la2 : TTATGGGATCTTCAACAACATCCATCAGGATATTGGAACACAGTGATCCATCATCTTTCCACAAAATCCCCACTATCACTT : 944

*          1020          *          1040          *          1060          *          1080          *
LA1 : GGTCCGATGCCACGAAAGCAGCTAAACATGTGTTGGGAAGATACTACAGAGAACCAAAGACGTCAGGAGCAATACCGATCCACTT : 1019
la1 : GGTCCGATGCCACGAAAGCAGCTAAACATGTGTTGGGAAGATACTACAGAGAACCAAAGACGTCAGGAGCAATACCGATCCACTT : 1047
LA2 : GGTCCGATGCCACGAAAGCAGCTAAACATGTGTTGGGAAGATACTACAGAGAACCAAAGACGTCAGGAGCAATACCGATCCACTT : 1028
la2 : GGTCCGATGCCACGAAAGCAGCTAAACATGTGTTGGGAAGATACTACAGAGAACCAAAGACGTCAGGAGCAATACCGATCCACTT : 1028

1100          *          1120          *          1140          *          1160          *
LA1 : GGTGGAGAGTTTGGTCCGCAAGTATTAAGCAAAAGATCATTACGTCAGTGACACTGGTGATATTGTCTTCTACGAGACAGATCCAGA : 1103
la1 : GGTGGAGAGTTTGGTCCGCAAGTATTAAGCAAAAGATCATTACGTCAGTGACACTGGTGATATTGTCTTCTACGAGACAGATCCAGA : 1131
LA2 : GGTGGAGAGTTTGGTCCGCAAGTATTAAGCAAAAGATCATTACGTCAGTGACACTGGTGATATTGTCTTCTACGAGACAGATCCAGA : 1112
la2 : GGTGGAGAGTTTGGTCCGCAAGTATTAAGCAAAAGATCATTACGTCAGTGACACTGGTGATATTGTCTTCTACGAGACAGATCCAGA : 1112

1180          *          1200          *
LA1 : TCTCTACGTTTATGCTTCTGACAAATCCAAAATCAATTAA : 1143
la1 : TCTCTACGTTTATGCTTCTGACAAATCCAAAATCAATTAA : 1171
LA2 : TCTCTACGTTTATGCTTCTGACAAATCCAAAATCAATTAA : 1152
la2 : TCTCTACGTTTATGCTTCTGACAAATCCAAAATCAATTAA : 1152

```

**Supplementary Figure S1. Alignment of the coding DNA sequences of the *SalFAD3.LA1* alleles *LA<sup>1</sup>*, *la<sup>1</sup>* and the *SalFAD3.LA2* alleles *LA<sup>2</sup>* and *la<sup>2</sup>* in yellow mustard. The nucleotide sequence alignment was carried out using ClustalW2 (<http://www.ebi.ac.uk/Tools/msa/clustalw2/>).**
