# Supplementary material for: Detection and Molecular Characterization of Two FAD3 Genes Controlling Linolenic Acid Content and Development of Allele-Specific Markers in Yellow Mustard (Sinapis alba)
Source: PubMed Central journal article supplement (PMC4019595; doi:10.1371/journal.pone.0097430), 2014-05-13
Supplement: pone.0097430.s002.pdf [file pone.0097430.s002.pdf]

\* 20 \* 40 \* 60 \* 80  
 UP-LA<sup>1</sup> : CGACGGCCCGGGCTGGTATCGATATGAATCGTTTTATGATTGATAAGTAGTCGAGGAAATTTTCGCAGAAACAAATATATGG : 84  
 UP-l<sup>a1</sup> : CGACGGCCCGGGCTGGTATCGATATGAATCGTTTTATGATTGATAAGTAGTCGAGGAAATTTAAAGCAGAAACAAATATATGG : 84  
 UP-LA<sup>2</sup> : CGACGGCCCGGGCTGGTATC--TTCGAATC--TCAT-ATTAT-----GAAATT-----AGTCTAA-- : 51  
 UP-l<sup>a2</sup> : CGACGGCCCGGGCTGGTATC--TTCGAATC--TCAT-ATTAT-----GAAATT-----AGTCTAA-- : 51

\* 100 \* 120 \* 140 \* 160  
 UP-LA<sup>1</sup> : AGAAGACAAACATGATATTTTCGACCACATGTATAATGTATTACTCTAAAGTAAGAAACATAAACAAATTTGTATTTGGTATAAT : 168  
 UP-l<sup>a1</sup> : AGAAGACACACATGATATTTTCGACCACATGTATAATGCATTACTCTAAAGTAAGAAACATAAACAAATTTGAATTTGGTATAAT : 168  
 UP-LA<sup>2</sup> : -----ATTTT-----AAACATAAACAAATTTA-----TACCGAC : 78  
 UP-l<sup>a2</sup> : -----ATTTT-----AAACATAAACAAATTTA-----TACCGAC : 78

\* 180 \* 200 \* 220 \* 240 \*  
 UP-LA<sup>1</sup> : CCTTACGCTAAGGAAAATCTATAGAGAAAAAAGGATATAAAAATCTTGGTAAATTTATAGATGCGATGGT-ACCTTACTCAAT : 251  
 UP-l<sup>a1</sup> : CCTTACGT-----AAATTATCGATGCGATGGTACTTACTTACTCAAT : 209  
 UP-LA<sup>2</sup> : ---GAGATCT-----ACA-----AATGGC : 88  
 UP-l<sup>a2</sup> : ---GAGATCT-----ACA-----AATGGC : 88

260 \* 280 \* 300 \* 320 \*  
 UP-LA<sup>1</sup> : ACTAAGATT-AGTTAACTAAAATCTCTCAAAATCTTAT----AGAAAAATTCGTAACAAATTTCTACAACCTTATTTTTTCA : 328  
 UP-l<sup>a1</sup> : ACTAAGATTATAGTTA--TAAAAATCTTCTCAGAATCTTATTTTAAAAAAAATTCATAACAAATTTCTACAACCTTATTTTTTCA : 291  
 UP-LA<sup>2</sup> : ---GAGATCT-----TTTTCTTAGAATTTTAT-----AACA-----TTACTTTAGCG : 127  
 UP-l<sup>a2</sup> : ---GAGATCT-----TTTTCTTAGAATTTTAT-----AACA-----TTACTTTAGCG : 127

340 \* 360 \* 380 \* 400 \* 420  
 UP-LA<sup>1</sup> : AAAAGAAAAATTTATA-----TAACTTAGTTTTTCATCGAAATGAACGACGTAACAAAG--ATACTTTGACG-----GCAA : 396  
 UP-l<sup>a1</sup> : AAAAGTAAAATTTATACTCCGTATAAAGTTAGTTTTTCATCGAAATGAACGACGTAACAAAG--ATACTTTGACG-----GCAA : 366  
 UP-LA<sup>2</sup> : TAAAC--ACATTTCTC-----CAATTTGTTTTTCATTCGARTGAACGACGTAACAAAGTAATACACCCCAACCCATTGTACAA : 202  
 UP-l<sup>a2</sup> : TAAAC--ACATTTCTC-----CAATTTGTTTTTCATTCGARTGAACGACGTAACAAAGTAATACACCCCAACCCATTGTACAA : 202

\* 440 \* 460 \* 480 \* 500  
 UP-LA<sup>1</sup> : AATTTACAGCAAAAATCCACATTTTATTCTCAAAATAAAATAAAAGGCAATTTTTTAATTTTTTTTTTAAACAAAACATAC : 480  
 UP-l<sup>a1</sup> : AATTTACAGCAAAAATCCACATTTTATTCTCAAAATAAAATAAAAGGCAATTTTTTAATTTTTTTTTTAAACAAAACATAC : 414  
 UP-LA<sup>2</sup> : AATTTACAGCAAAAATACCCTTTTTATTCTTTTGATAAAAGAAATAAA : 249  
 UP-l<sup>a2</sup> : AATTTACAGCAAAAATACCCTTTTTATTCTTTTGATAAAAGAAATAAA : 249

\* 520 \* 540 \* 560 \* 580  
 UP-LA<sup>1</sup> : CTCAATAAAAATAAAATGACTAAAATAGTTTTTTTTTTGAAAATTTTAATTTTTTAATTTTTTTTTTTTTTAAATTTTACC : 564  
 UP-l<sup>a1</sup> : ----- : -  
 UP-LA<sup>2</sup> : ----- : -  
 UP-l<sup>a2</sup> : ----- : -

\* 600 \* 620 \* 640 \* 660 \*  
 UP-LA<sup>1</sup> : CTCAAAATTTGCCACTTTAACTTTAAAGCCTAAGTCTATATCAGTTAACTCTAAAGATAAAAAGCGTTATTTACCTATTTAATA : 648  
 UP-l<sup>a1</sup> : ----- : -  
 UP-LA<sup>2</sup> : ----- : -  
 UP-l<sup>a2</sup> : ----- : -

680 \* 700 \* 720 \* 740 \*  
 UP-LA<sup>1</sup> : AAATATTTTTAATATTTTTTAGATATTTTTTGGCAATTTCTTAAATAACTATTTTTAAGTTTTTGCACAAAAATAGCTCTC : 732  
 UP-l<sup>a1</sup> : ----- : -  
 UP-LA<sup>2</sup> : ----- : -  
 UP-l<sup>a2</sup> : ----- : -

760 \* 780 \* 800 \* 820 \* 840  
 UP-LA<sup>1</sup> : AAAAAATAAAATGACCAAAAATAGATTTTTTTTTTGAATTTTGAATTTTTTTTTTGAATTTTTTGAATTTTTTGAACCCCTAACCC : 816  
 UP-l<sup>a1</sup> : ----- : -  
 UP-LA<sup>2</sup> : ----- : -  
 UP-l<sup>a2</sup> : ----- : -

\* 860 \* 880 \* 900 \* 920  
 UP-LA<sup>1</sup> : TAAACCCACCCCTTACTCTAAAACCTAAAATCCAATAGTTAACCCCTAGGGATATAAATGCATATAAATGAATTTTTTAGCT : 900  
 UP-l<sup>a1</sup> : ----- : -  
 UP-LA<sup>2</sup> : ----- : -  
 UP-l<sup>a2</sup> : ----- : -

```

          *          940          *          960          *          980          *          1000
UP- LA1 : TCTAAAAAACATTTTGGTCATTTTCTTCCCTTAAAAGCTATTTTGTGACAAACAATCTAAATGGGCTATCTAAGAGAATTT : 984
UP- la1 : ----- : -
UP- LA2 : ----- : -
UP- la2 : ----- : -

          *          1020          *          1040          *          1060          *          1080          *
UP- LA1 : CTCTATTATTTTTGTAAAAATAAATAAAAGAGCTATTTTACATAATTTTTCATAAATAAATCTTATAAAATAAAAATAAAT : 1068
UP- la1 : -----AATCTTTTAAATCAAAAAATAATT : 439
UP- LA2 : -----TCATTAACATTAAAAAA----- : 267
UP- la2 : -----TCATTAACATTAAAAAA----- : 267

          1100          *          1120          *          1140          *          1160          *
UP- LA1 : GAAACAGTTTTCCGTC-TTTCTCAATGTCTCTCTCTACACATCTTCCCTTTATATAAACAAACCCACACAAACAGCAAAAC : 1151
UP- la1 : GAAACAGTTTTCCGTC-TTTCTCAATGTCTCTCTCTCTACACATCTTCCCTTTATATAAACAAACCCACACAAACAGCAAAAC : 522
UP- LA2 : ---AACAAATTGCAGTAATTTCTCAATG-----TCTATACATCTTCTCCCTTTATATAAGCCCAACCTCTCACACCAGAAAA : 342
UP- la2 : ---AACAAATTGCAGTAATTTCTCAATG-----TCTATACATCTTCTCCCTTTATATAAGCCCAACCTCTCACACCAGAAAA : 342

          1180          *          1200          *          1220          *          1240          *          1260
UP- LA1 : --TCAATCGAACCTTTCTTCACCACATTTCACTCAGAGC--CCACACAGTTTAGAGAGAGAGAGAGAGAAACATCCCTCAAA : 1231
UP- la1 : --TCCATCGAACCTTTCTTCACCACATTTCACTCAGAGC--CCACACAGTTTAGAGAGAGAGAGAGAGAAACATCCCTCAAA : 602
UP- LA2 : AATCCATCAAAACC-TTTCTTCACCACATTTCACTCAGAGAGGCCACACATCT-----AGAGAGAGAAACTTCTCCAAAA : 415
UP- la2 : AATCCATCAAAACC-TTTCTTCACCACATTTCACTCAGAGAGGCCACACATCT-----AGAGAGAGAAACTTCTCCAAAA : 415

          *          1280
UP- LA1 : GCTCCCTCTTCTC-----CGGCG : 1250
UP- la1 : GCTCCCTCTTCTC-----CGGCG : 621
UP- LA2 : TCTCTCTCTCTCTCTCAGTCTCTCCAGCT : 444
UP- la2 : TCTCTCTCTCTCTCTCAGTCTCTCCAGCT : 444

```

**Supplementary Figure S2. Alignment of the 5' upstream sequences of the *SalFAD3.LA1* and *SalFAD3.LA2* genes in yellow mustard.** *UP-LA<sup>1</sup>* and *UP-la<sup>1</sup>* represented the 5' upstream sequences of the alleles *LA<sup>1</sup>* and *la<sup>1</sup>* of the *SalFAD3.LA1* gene. *UP-LA<sup>2</sup>* and *UP-la<sup>2</sup>* indicated the 5' upstream sequences of the alleles *LA<sup>2</sup>* and *la<sup>2</sup>* of the *SalFAD3.LA2* gene. The nucleotide sequence alignment was carried out using ClustalW2 (<http://www.ebi.ac.uk/Tools/msa/clustalw2/>).
