# Supplementary material for: Detection and Molecular Characterization of Two FAD3 Genes Controlling Linolenic Acid Content and Development of Allele-Specific Markers in Yellow Mustard (Sinapis alba)
Source: PubMed Central journal article supplement (PMC4019595; doi:10.1371/journal.pone.0097430), 2014-05-13
Supplement: pone.0097430.s004.pdf [file pone.0097430.s004.pdf]

```

      *      20      *      40      *      60      *      80
Intron 3 of LA1 : GAGAATAAGCCATCGGACACACCACCAGAAC-----: 31
Intron 3 of la1 : GAGAATAAGCCATCGGACACACCACCAGAACTAGGCCTGGGCGTTCGGGGCCCCGTCGGATTTCGGTTTCGGTTAATTTGGAT : 81
Intron 3 of LA2 : GAGAATAAGCCATCGGACACACCACCAGAAC-----: 31
Intron 3 of la2 : GAGAATAAGCCATCGGACACACCACCAGAAC-----: 31

      *      100     *      120     *      140     *      160
Intron 3 of LA1 : -----: -
Intron 3 of la1 : TTTTCGGATTTTCGTTATTATGTTTCATAAGCCCCATTTCGGTTTTTTTCTCTTATTGAATGGGTTTCGGTTTCGGTTTCGGTTTT : 162
Intron 3 of LA2 : -----: -
Intron 3 of la2 : -----: -

      *      180     *      200     *      220     *      240
Intron 3 of LA1 : -----: -
Intron 3 of la1 : TTCCGGATTCGGTTTCGGATTGGATTCGGATTGTAACCAATGTTTGAATCGTCAAAAAAATATTTTTTAAATCATGAAAA : 243
Intron 3 of LA2 : -----: -
Intron 3 of la2 : -----: -

      *      260     *      280     *      300     *      320
Intron 3 of LA1 : -----: -
Intron 3 of la1 : ATGACAAAAAAACTCAAAATATATAAATATTTACAAAACTAATTAATAATAGTTAATTTATCTAAACTAACTGAAAA : 324
Intron 3 of LA2 : -----: -
Intron 3 of la2 : -----: -

      *      340     *      360     *      380     *      400
Intron 3 of LA1 : -----: -
Intron 3 of la1 : GTATTAATAAATAAATAAATAAATAAATAAATAAATAAATAAATAAATAAATAAATAAATAAATAAATAAATAAATAAATA : 405
Intron 3 of LA2 : -----: -
Intron 3 of la2 : -----: -

      *      420     *      440     *      460     *      480
Intron 3 of LA1 : -----: -
Intron 3 of la1 : ATATTAGCATATTTAACTAACTTTGGATGTCTTCGGATCCTAGTTTGGATTCGGTTTCGGTTTCGGTTCAAGTTATAACCAAAACCC : 486
Intron 3 of LA2 : -----: -
Intron 3 of la2 : -----: -

      *      500     *      520     *      540     *      560
Intron 3 of LA1 : -----: -
Intron 3 of la1 : AAAGTATTAAGATCACAAGTCCCCTTCGGATATTTTGTATAACGGTTTGGATCCGGTTTCGGTTTTTTTCGGTTTCGGTTTT : 567
Intron 3 of LA2 : -----: -
Intron 3 of la2 : -----: -

      *      580     *      600     *      620     *      640
Intron 3 of LA1 : -----: -
Intron 3 of la1 : AGGTAAGTAATTCGGGTTGGGGTAGAAACCCCAGGCTAACCAAGAACCATGGCCATGTTGAAAACGACGAGTCTTGGGTT : 648
Intron 3 of LA2 : -----: -
Intron 3 of la2 : -----: 64

      *      660     *      680     *      700     *      720
Intron 3 of LA1 : CCGTAATCTTTCCTCTCATAGT-----ATTTTCTTTCTTTTCTTTTCTTTTCTTTTCTTTTCTTTTCTTTTCTTTTCTTTT : 128
Intron 3 of la1 : CCGTAATCTTTCCTCTCATAGT-----ATTTTCTTTCTTTTCTTTTCTTTTCTTTTCTTTTCTTTTCTTTTCTTTTCTTTT : 712
Intron 3 of LA2 : CCGTAATCTTTCCTCTCATAGTCTTCTCTTCTTTTCTTTTCTTTTCTTTTCTTTTCTTTTCTTTTCTTTTCTTTTCTTTTCTTTT : 145
Intron 3 of la2 : CCGTAATCTTTCCTCTCATAGTCTTCTCTTCTTTTCTTTTCTTTTCTTTTCTTTTCTTTTCTTTTCTTTTCTTTTCTTTTCTTTT : 145

      *      740     *      760     *      780     *      800     *
Intron 3 of LA1 : CTTAGGATTCATGATTTATTTTAAATTAATA-----TTTTTCAG-----: 169
Intron 3 of la1 : CTTAGGATTCATGATTTATTTTAAATTAATA-----TTTTTCAG-----: 753
Intron 3 of LA2 : CTTAGGATTCATGATTTATTTTAAATTAATA-----TTTTTCAG-----: 187
Intron 3 of la2 : CTTAGGATTCATGATTTATTTTAAATTAATA-----TTTTTCAGAAAAATGAAA : 226

      *      820     *      840     *      860     *      880     *
Intron 3 of LA1 : -----TTTCAGGCTAGGACGACCAATTT-----GTCAGACTGT-----CGTTAGCTGTAATAA-----AAATGATTTA : 229
Intron 3 of la1 : -----TTTCAGGCTAGGACGACCAATTT-----GTCAGACTGT-----CGTTAGCTGTAATAA-----AAATGATTTA : 813
Intron 3 of LA2 : -----TTTCAGGCTAGGACGACCAATTT-----GTCAGACTGT-----CGTTAGCTGTAATAA-----AAATGATTTA : 248
Intron 3 of la2 : AATCAATACCTTTTACTACTCCCTCCGTTTCAAAATGTTACATGTTTTCAGGTTTTTCACACATATTAAATAAAAACATATTA : 307

```

Intron 3 of LA<sup>1</sup> : -----900-----\*-----920-----\*-----940-----\*-----960-----\*----- : 234  
 Intron 3 of la<sup>1</sup> : -----AAGTC----- : 818  
 Intron 3 of LA<sup>2</sup> : -----CAACTCTA-----ATAGTTC-----ACCAGT-----GAT----- : 272  
 Intron 3 of la<sup>2</sup> : AATCTTAACATTAAATCTATAAATTTTTGTGATTAAGTATTTCCCATAACTTTTAACCAATCAAAATTCATAAGTACAAT : 388

Intron 3 of LA<sup>1</sup> : -----980-----\*-----1000-----\*-----1020-----\*-----1040-----\*----- : 246  
 Intron 3 of la<sup>1</sup> : -----GTTTAAAGT-----ACT----- : 830  
 Intron 3 of LA<sup>2</sup> : TGATTATCTTAGTGCTTAAAGT-----AGTAACT-----CTTCAAAAAATGAAAAAT-----CAA----- : 324  
 Intron 3 of la<sup>2</sup> : TAATTTCTTGA-AGTTTAAATTTATCATTATTAAGTACTAAAAATTCATTGAAAAAGTAAAAATGTAACCTTTGACAA : 468

Intron 3 of LA<sup>1</sup> : -----1060-----\*-----1080-----\*-----1100-----\*-----1120-----\*----- : 284  
 Intron 3 of la<sup>1</sup> : -----GTAGTAACTTTAACAAAGGACCACCTTATATTCGACGT : 868  
 Intron 3 of LA<sup>2</sup> : TACTTTT-----AT-----ACTAGTACCTAACTTTAACGATGGACCACCTTATATTCGAT-C : 374  
 Intron 3 of la<sup>2</sup> : AAATTTTGTAGAAAAATGGATTATTTAGAAAACGGGGAGTAGTACCTAACTTTAACGATGGACCACCTTATATTCGAT-C : 548

Intron 3 of LA<sup>1</sup> : -----1140-----\*-----1160-----\*-----1180-----\*-----1200-----\*----- : 355  
 Intron 3 of la<sup>1</sup> : CATTGGCATAAAATGATTCTCCTCGAATTCGTTTACTTTCTTACTATTTTTCT-----GTTTTGGACCTTTCAI----- : 939  
 Intron 3 of LA<sup>2</sup> : CATTAGCATAAAATGATTCTCCTCGAATTCGTTTACTTTCTTACTATTTTTCT-----GTTTTGGACCTTTCAI----- : 455  
 Intron 3 of la<sup>2</sup> : CATTAGCATAAAATGATTCTCCTCGAATTCGTTTACTTTCTTACTATTTTTCTCAAAACAGTTTGGCCTTTTGTGTGCA : 629

Intron 3 of LA<sup>1</sup> : -----1220-----\*-----1240-----\*-----1260-----\*-----1280-----\*----- : 422  
 Intron 3 of la<sup>1</sup> : -----AGAACTAATAA-AAAAGAAAAAAGTTATAAA-----CACACCACATGCAGTTAATTAATTTCAACATATAAAT : 1013  
 Intron 3 of LA<sup>2</sup> : ATCTTGAAAAGTATTTGAAAATTCAAAAGTTATA-----CACATCACATGCAGTTAATTAATTCGAATATATAAACA : 527  
 Intron 3 of la<sup>2</sup> : ATCTTGAAAAGTATTTAAT-AAAATGAAAAGTTATA-----CACATCACATGCAGTTAATTAATTCGAATATATAAACA : 700

Intron 3 of LA<sup>1</sup> : -----1300-----\*-----1320-----\*-----1340-----\*-----1360-----\*-----1380 : 476  
 Intron 3 of la<sup>1</sup> : TAACTATAA-TTTTAAAT-TTACTCTTCC-----GTTTCGCAAGAGTGTCTTTTAGA----- : 1030  
 Intron 3 of LA<sup>2</sup> : TAAAGCAAAATTTTCAATGAATATTTAATA----- : 557  
 Intron 3 of la<sup>2</sup> : GAAGCAAAATTTTCAATGAATATTTAATACTCCCTCTGTTTATAATAAGTGTCAATTTAGATTTATGCACACGGATTAA : 781

Intron 3 of LA<sup>1</sup> : -----1400-----\*-----1420-----\*-----1440-----\*-----1460 : 492  
 Intron 3 of la<sup>1</sup> : -----GAAATTTTTCATTATA----- : -  
 Intron 3 of LA<sup>2</sup> : ----- : -  
 Intron 3 of la<sup>2</sup> : GAAAACATTTAATTTTACATATTTTCTATATAAAAACATCATTTCCCATACCTAACTATATTTCAACCATAGAAAATAA : 862

Intron 3 of LA<sup>1</sup> : -----1480-----\*-----1500-----\*-----1520-----\*-----1540 : -  
 Intron 3 of la<sup>1</sup> : ----- : -  
 Intron 3 of LA<sup>2</sup> : ----- : -  
 Intron 3 of la<sup>2</sup> : AATTGAAAAATAAATTCCTTAAATTTTGTATTGAAAACGAAAACGACACTTATTTTCGTAAACAAAAATTTCTCTAAAAC : 943

Intron 3 of LA<sup>1</sup> : -----1560-----\*-----1580-----\*-----1600-----\*-----1620 : 521  
 Intron 3 of la<sup>1</sup> : -----AAATAAATGTCGTTTATGATTTCAATGC----- : 1035  
 Intron 3 of LA<sup>2</sup> : -----ATTTAA----- : 565  
 Intron 3 of la<sup>2</sup> : GACTCTCTTTGTGAAAACGGAGGAGTAAAGTAAAGTAACTATTCTCCGTTTATATTATTGTGCTGTAGAAAAAAA : 1024

Intron 3 of LA<sup>1</sup> : -----1640-----\*-----1660-----\*-----1680-----\*-----1700 : 590  
 Intron 3 of la<sup>1</sup> : -----TTTTAGTTTAAATTTCTATTGGTTGAAATATGATTAGGTATATGGGTAATG : -  
 Intron 3 of LA<sup>2</sup> : ----- : -  
 Intron 3 of la<sup>2</sup> : ATTGTTTATCGTTTCAATGCAAAATAATTTTTACCTTTATTTTTTATTGATTGAAATATGATTAAATCTATAGATAAAT : 1105

Intron 3 of LA<sup>1</sup> : -----1720-----\*-----1740-----\*-----1760-----\*-----1780 : 671  
 Intron 3 of la<sup>1</sup> : ATGTTTTCTATAGAAAATATGCAAAATTAATGTTTTCTTAATCTGTGTGCAAAAAGCTAAAACGACATTTGTTATGAAA : -  
 Intron 3 of LA<sup>2</sup> : ----- : -  
 Intron 3 of la<sup>2</sup> : ATGTTTTATTTAGAAAATATATAAATTAATATTTTTCTTAATATGATGCAATAAATCTATATGACAGTAATATAAAA : 1186

```

      *           1800           *           1820           *           1840           *           1860
Intron 3 of LA1 : CAGAGAGAGT---AATFAACATTTAAATCTTAATT-TTGCATTTTCAGTTCCAGAAAAATTATACAAGAATTGTCCCACA : 748
Intron 3 of la1 : -----TTAACATTTTAATCTTAATT-TTGCATTTTCAGTTCCAGAAAAATTATACAAGAATTGTCCCACA : 1100
Intron 3 of LA2 : -----TAGTCATATTAATTTAAATTTATGCATTTTCAGTTCCAGAAAAATTGTACAAGAACTTGCCCCATA : 631
Intron 3 of la2 : TGGAGAGAGTGGTAAATAGTCATATTAATTTAAATTTATGCATTTTCAGTTCCAGAAAAATTGTACAAGAACTTGCCCCATA : 1266

      *           1880
Intron 3 of LA1 : GTACACGGATGCTCAGATACACCGT : 773
Intron 3 of la1 : GTACACGGATGCTCAGATACACCGT : 1125
Intron 3 of LA2 : GTACTCGGATGCTCAGATACACCGT : 656
Intron 3 of la2 : GTACTCGGATGCTCAGATACACCGT : 1291

```

**Supplementary Figure S4. Nucleotide sequences alignment of intron 3 of *SalFAD3.LA1* and *SalFAD3.LA2* genes in yellow mustard.** The sequence of exon 3 was underlined in red while that of exon 4 was underlined in green. The nucleotide sequence of inserted fragment in exon 3 of *la*<sup>1</sup> was from position 31 to 615. The new intron splicing site GT in the inserted fragment in exon 3 of *la*<sup>1</sup> was underlined in black. The nucleotides in blue rectangle indicated the inserted fragment that remained in the CDS of exon 3 of *la*<sup>1</sup>. The nucleotides in black rectangle indicated the 5 bp direct repeat (5'-AGAAC-3').
