# Supplementary material for: Detection and Molecular Characterization of Two FAD3 Genes Controlling Linolenic Acid Content and Development of Allele-Specific Markers in Yellow Mustard (Sinapis alba)
Source: PubMed Central journal article supplement (PMC4019595; doi:10.1371/journal.pone.0097430), 2014-05-13
Supplement: pone.0097430.s005.pdf [file pone.0097430.s005.pdf]

```

*      20      *      40      *      60      *      80
LA1   : M V V A M D Q R S N V N G D S ----- S E E R F D P S A Q P P F K I G D I R A A I P K H C W V K S P L R S M S Y V A R D I F A V V A L A V A A V Y F N S W L F : 75
LA2   : M V V A M D Q R S N V N G V S G G --- R E E G F D P S A Q P P F K I G D I R A A I P K H C W V K S P L R S M S Y V V R D I F A V A A M A M A A V Y F D S W E L : 78
AFJ19039.1 : M V V A M D Q R S N V N G D S G A --- R E E G F D P S E Q P P F K I G D I R A A I P K H C W V K S P L R S M S Y V A R D I F A V A A L A M A A V Y F D S W E L : 78
AFJ19037.1 : M V V A M D Q R S N V N G D S ----- R D E R F D P S A Q P P F K I G D I R A A I P K H C W V K S P L R S M S Y V A R D I F S V V A L A V A A V Y F D S W E F : 75
AGH20189.1 : M V V A M D Q R S N V N G D S ----- R D E R F D P S A Q P P F K I G D I R A A I P K H C W V K S P L R S M S Y V A R D I F A V V A L A V A A V Y F D S W E F : 75
ADJ58020.1 : M V V A M D Q R S N A N G D ----- E R F D P S A Q P P F K I G D I R A A I P K H C W V K S P L R S M S Y V A R D I F A V V A L A V A A V Y F D S W E L : 72
Bra018348 : M V V A M D Q R S N V N G D S G A --- R E E G F D P S E Q P P F K I G D I R A A I P K H C W V K S P L R S M S Y V A R D I F A V A A L A M A A V Y F D S W E L : 78
NP_180559 : M V V A M D Q R T N V N G D P G A G D R K E E R F D P S A Q P P F K I G D I R A A I P K H C W V K S P L R S M S Y V V R D I F A V A A L A M A A V Y F D S W E L : 81

*      100     *      120     *      140     *      160
LA1   : W P L Y W A A Q G T L F W A I F V L G H D C G H G S F S D I E L L N T V V G H I L H S F I L V P Y H G W R I S H R T H H Q N H G H V E N D E S W V P L P E K L Y K : 156
LA2   : W P L Y W A A Q G T L F W A I F V L G H D C G H G S F S D I E L L N S V V G H I L H S F I L V P Y H G W R I S H R T H H Q N H G H V E N D E S W V P L P E K L Y K : 159
AFJ19039.1 : W P L Y W V A Q G T L F W A I F V L G H D C G H G S F S D I E L L N S V V G H I L H S F I L V P Y H G W R I S H R T H H Q N H G H V E N D E S W V P L P E K L Y K : 159
AFJ19037.1 : W P L Y W A A Q G T L F W A I F V L G H D C G H G S F S D I E L L N T A V G H I L H S F I L V P Y H G W R I S H R T H H Q N H G H V E N D E S W V P L P E K L Y K : 156
AGH20189.1 : W P L Y W A A Q G T L F W A I F V L G H D C G H G S F S D I E L L N T A V G H I L H S F I L V P Y H G W R I S H R T H H Q N H G H V E N D E S W V P L P E K L Y K : 156
ADJ58020.1 : W P L Y W A A Q G T L F W A I F V L G H D C G H G S F S D I S L L N T A V G H I L H S F I L V P Y H G W R I S H R T H H Q N H G H V E N D E S W V P L P E K L Y K : 153
Bra018348 : W P L Y W V A Q G T L F W A I F V L G H D C G H G S F S D I E L L N S V V G H I L H S F I L V P Y H G W R I S H R T H H Q N H G H V E N D E S W V P L P E K L Y K : 159
NP_180559 : W P L Y W A A Q G T L F W A I F V L G H D C G H G S F S D I E L L N S V V G H I L H S F I L V P Y H G W R I S H R T H H Q N H G H V E N D E S W V P L P E R V Y K : 162

*      180     *      200     *      220     *      240
LA1   : K L S H S T R M L R Y T V P L P M L A Y P I Y L W Y R S P G K E G S H E N P Y S S L F A P S E R N L I A T S T T C W S I M L A T L V Y L S F L V G P P V T V L K V Y : 237
LA2   : N L P H S T R M L R Y T V P L P M L A Y P I Y L W Y R S P G K E G S H E N P Y S S L F A P S E R K L I A T S T T C W S I M L A T L V Y L S F L V G P V T V L K V Y : 240
AFJ19039.1 : N L P H S T R M L R Y T V P L P M L A Y P I Y L W Y R S P G K E G S H E N P Y S S L F A P S E R K L I A T S T T C W S I M L A T L V Y L S F L V G P V T V L K V Y : 240
AFJ19037.1 : N L P H S T R M L R Y T V P L P M L A Y P I Y L W Y R S P G K E G S H E N P Y S S L F A P S E R K L I A T S T T C W S I V L A T L V Y L S F L V G P V T V L K V Y : 237
AGH20189.1 : N L P H S T R M L R Y T V P L P M L A Y P I Y L W Y R S P G K E G S H E N P Y S S L F A P S E R K L I A T S T T C W S I V L A T L V Y L S F L V G P V T V L K V Y : 237
ADJ58020.1 : N L P H S T R M L R Y T V P L P M L A Y P I Y L W Y R S P G K E G S H E N P Y S S L F A P S E R K L I A T S T T C W S I M L A T L V Y L S F L V G P V T V L K V Y : 234
Bra018348 : N L P H S T R M L R Y T V P L P M L A Y P I Y L W Y R S P G K E G S H E N P Y S S L F A P S E R K L I A T S T T C W S I M L A T L V Y L S F L V G P V T V L K V Y : 240
NP_180559 : K L P H S T R M L R Y T V P L P M L A Y P I Y L C Y R S P G K E G S H E N P Y S S L F A P S E R K L I A T S T T C W S I M F V S L I A L S F V E G P L A V L K V Y : 243

*      260     *      280     *      300     *      320
LA1   : G V P Y I I F V M W L D A V T Y L H H H G H D D K L P W Y R G K E W S Y L R G G L T T D R D Y G I F N N I H H D I G T H V I H H L F P Q I P H Y H L V D A T K A : 318
LA2   : G V P Y I I F V M W L D A V T Y L H H H G H D G K L P W Y R G K E W S Y L R G G L T T D R D Y G I F N N I H H D I G T H V I H H L F P Q I P H Y H L V D A T K A : 321
AFJ19039.1 : G V P Y I I F V M W L D A V T Y L H H H G H D E K L P W Y R G K E W S Y L R G G L T T D R D Y G I F N N I H H D I G T H V I H H L F P Q I P H Y H L V D A T R A : 321
AFJ19037.1 : G V P Y I I F V M W L D A V T Y L H H H G H D D K L P W Y R G K E W S Y L R G G L T T D R D Y G I F N N I H H D I G T H V I H H L F P Q I P H Y H L V D A T K A : 318
AGH20189.1 : G V P Y I I F V M W L D A V T Y L H H H G H D D K L P W Y R G K E W S Y L R G G L T T D R D Y G I F N N I H H D I G T H V I H H L F P Q I P H Y H L V D A T K A : 318
ADJ58020.1 : G V P Y I I F V M W L D A V T Y L H H H G H D D K L P W Y R G K E W S Y L R G G L T T D R D Y G I F N N I H H D I G T H V I H H L F P Q I P H Y H L V D A T K S : 315
Bra018348 : G V P Y I I F V M W L D A V T Y L H H H G H D E K L P W Y R G K E W S Y L R G G L T T D R D Y G I F N N I H H D I G T H V I H H L F P Q I P H Y H L V D A T R A : 321
NP_180559 : G V P Y I I F V M W L D A V T Y L H H H G H D E K L P W Y R G K E W S Y L R G G L T T D R D Y G I F N N I H H D I G T H V I H H L F P Q I P H Y H L V D A T K A : 324

*      340     *      360     *      380
LA1   : A K H V L G R Y Y R E P K T S G A I P I H L V E S L V A S I K K D H Y V S D T G D I V F Y E T D P D L Y V Y A S D K S K I N : 380
LA2   : A K H V L G R Y Y R E P K T S G A I P I H L V E S L V A S I K K D H Y V S D T G D I V F Y E T D P D L Y V Y A S D K S K I N : 383
AFJ19039.1 : A K H V L G R Y Y R E P K T S G A I P I H L V E S L V A S I K K D H Y V S D T G D I V F Y E T D P D L Y V Y A S D K S K I N : 383
AFJ19037.1 : A K H V L G R Y Y R E P K T S G A I P I H L V E S L V A S I K K D H Y V S D T G D I V F Y E T D P D L Y V Y A S D K S K I N : 380
AGH20189.1 : A K H V L G R Y Y R E P K T S G A I P I H L V E S L V A S I K K D H Y V S D T G D I V F Y E T D P D L Y V Y A S D K S K I N : 380
ADJ58020.1 : A K H V L G R Y Y R E P K T S G A I P I H L V E S L V A S I K K D H Y V S D T G D I V F Y E T D P D L Y V Y A S D K S K I N : 377
Bra018348 : A K H V L G R Y Y R E P K T S G A I P I H L V E S L V A S I K K D H Y V S D T G D I V F Y E T D P D L Y V Y A S D K S K I N : 383
NP_180559 : A K H V L G R Y Y R E P K T S G A I P I H L V E S L V A S I K K D H Y V S D T G D I V F Y E T D P D L Y V Y A S D K S K I N : 386

```

Supplementary Figure S5. Amino acid sequences encoded by the *SalFAD3.LA1* allele *LA<sup>1</sup>* and the *SalFAD3.LA2* allele *LA<sup>2</sup>* of yellow mustard, AFJ19039.1 (*BraA.FAD3a*) and AFJ19037.1 (*BnaC.FAD3b*) of *B. napus*, AGH20189.1 of *B. oleracea*, ADJ58020.1 of *B. juncea*, Bra018348 of *B. rapa*, NP\_180559 of *A. thaliana*. The amino acid sequence alignment was carried out by ClustalW2 (<http://www.ebi.ac.uk/Tools/msa/clustalw2/>).
