# Supplementary material for: Detection and Molecular Characterization of Two FAD3 Genes Controlling Linolenic Acid Content and Development of Allele-Specific Markers in Yellow Mustard (Sinapis alba)
Source: PubMed Central journal article supplement (PMC4019595; doi:10.1371/journal.pone.0097430), 2014-05-13
Supplement: pone.0097430.s006.pdf [file pone.0097430.s006.pdf]

**Supplementary Table S1** Primers used in this study.

| No | Primer    | Sequence (5'-3')            | Purpose                                                                               |
|----|-----------|-----------------------------|---------------------------------------------------------------------------------------|
| 1  | FAD3 F    | ATGGTTGTYGCTATGGACC         | To clone the coding region of the <i>FAD3</i> gene                                    |
|    | FAD3 R    | TTAATTGATTTTGGATTTGTCAGAAGC |                                                                                       |
| 2  | GSPA1     | AATCGCCGCTCTTATATCTCCGATCTT | To get the 5' flanking sequence                                                       |
|    | GSPA2     | TCTTCCGAGGAATCTCCGTTACATTG  |                                                                                       |
| 3  | GSPB1     | TCAAACCCTTCTTCCTTCCGGCCACCG | To get the 3' flanking sequence                                                       |
|    | GSPB2     | CGGCCACCGGAGACTCCGTTACATTG  |                                                                                       |
| 4  | DGSP1     | ACATTCATCACGATATTGGAACACG   | To get the 3' flanking sequence                                                       |
|    | DGSP2     | ACACTGGTGATATTGTCTTCTACGAGA |                                                                                       |
| 5  | AP F      | GCGATGGTTACTTATACTCA        | To get the genomic DNA sequences of <i>LA</i> <sup>1</sup> and <i>la</i> <sup>1</sup> |
|    | AW R      | AATAGAGCTAGGAAGATAGG        |                                                                                       |
| 6  | BP F      | CTGGTATCTTCGAATCTCAT        | To get the genomic DNA sequences of <i>LA</i> <sup>2</sup> and <i>la</i> <sup>2</sup> |
|    | BW R      | CGTGACACATTGTTGTTGTA        |                                                                                       |
| 7  | EX1-2 F   | GAGAATAAGCCATCGGACAC        | To sequence the whole gene                                                            |
|    | EX1-2 R   | ACGAGGATGAATGAATGAAG        |                                                                                       |
| 8  | EX2-3 F   | TCTGCTGAACAGTGTGGTGG        | To sequence the whole gene                                                            |
|    | EX2-3 R   | CATGGTTCTGGTGGTGTGTC        |                                                                                       |
| 9  | EX3-4 F   | AGGAGAATAAGCCATCGGAC        | To sequence the whole gene                                                            |
|    | EX3-4 R   | GGACGGTGTATCTGAGCATC        |                                                                                       |
| 10 | EX4-7 F   | TACTCGGATGCTCAGATACA        | To generate <i>FAD3</i> allele-specific markers                                       |
|    | EX4-7 R   | CGTGATGGATGTTGTTGAAG        |                                                                                       |
| 11 | EX5-U F   | CAACTTCAACTACTTGCTGG        | To generate <i>FAD3</i> allele-specific markers                                       |
|    | EX5-U R   | AATAGAGCTAGGAAGATAGG        |                                                                                       |
| 12 | SalFAD3 F | GCCATGTTGAAAACGACGAG        | To generate <i>FAD3</i> allele-specific markers                                       |
|    | SalFAD3 R | ACAGTGTATCTGAGCATCCG        |                                                                                       |
